# Supplementary material
Source: Springer Nature journal article supplement (https://www.springermedizin.de/resource/supplementary/12967_2014_1823_MOESM4_ESM.pdf/9574900)

**A**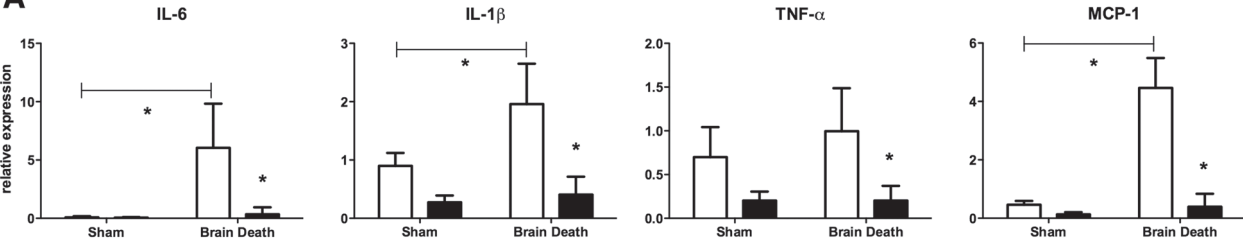**B**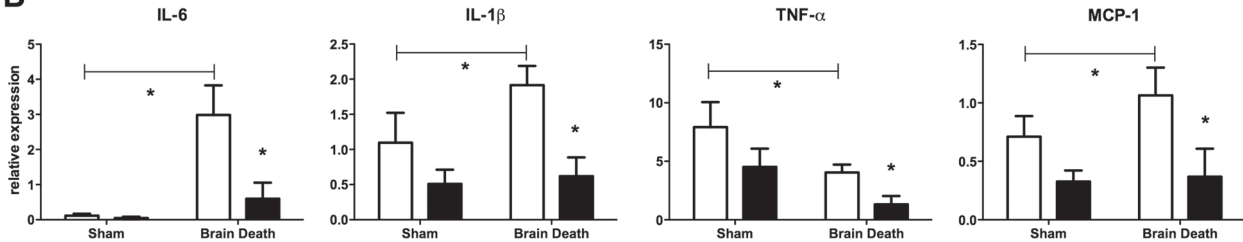

Saline

Prednisolone

\*  $p < 0.05$

Supplement: MOESM4 [file 9574900]
